# Supplementary material for: Recent advances in heterostructured cathodic electrocatalysts for non-aqueous Li–O2 batteries
Source: PubMed Central journal article supplement — Chem Sci. 2021 Dec 22;13(10):2841–56. doi: 10.1039/d1sc05781b (PMC8905958; doi:10.1039/d1sc05781b), 2021-12-22
Supplement: SC-013-D1SC05781B-s001.pdf [file SC-013-D1SC05781B-s001.pdf]

**Recent Advances in Heterostructured Cathodic Electrocatalysts for Non-aqueous Li-O<sub>2</sub> Batteries**

Qing Xia<sup>a</sup>, Deyuan Li<sup>b</sup>, Lanling Zhao<sup>c</sup>, Jun Wang<sup>\*b</sup>, Yuxin Long<sup>b</sup>, Xue Han<sup>b</sup>, Zhaorui Zhou<sup>b</sup>, Yao Liu<sup>\*b</sup>, Yiming Zhang<sup>b</sup>, Yebing Li<sup>b</sup>, Abulgasim Ahmed Abbaker Adam<sup>b</sup>, Shulei Chou<sup>\*a</sup>

*a Institute for Carbon Neutralization, College of Chemistry and Materials Engineering, Wenzhou University, Wenzhou, 325035, China*

*b Key Laboratory for Liquid-Solid Structural Evolution and Processing of Materials (Ministry of Education), Shandong University, Jinan, 250061, China*

*c School of Physics, Shandong University, Jinan, 250100, China*

E-mail: [chou@wzu.edu.cn](mailto:chou@wzu.edu.cn)

**Table S1** Comparison table of the synthesis methods and electrocatalytic performance based on reported typical heterostructures catalysts for Li-O<sub>2</sub> batteries.

| Materials                                            | Synthesis Method                                                                                                   | 1 <sup>st</sup> Discharge Capacity <sup>a/</sup><br>Current Density                                     | Overall Potential<br>Gap/<br>Current Density                    | Cycles or hours/Current<br>Density-Fixed Capacity                                                            | Ref.     |
|------------------------------------------------------|--------------------------------------------------------------------------------------------------------------------|---------------------------------------------------------------------------------------------------------|-----------------------------------------------------------------|--------------------------------------------------------------------------------------------------------------|----------|
| Mo <sub>2</sub> C@CNTs                               | Ball Milling+Thermal<br>Treatment                                                                                  | -                                                                                                       | 0.47 V/100 mA g <sup>-1</sup>                                   | 100/100 mA g <sup>-1</sup> -500 mAh g <sup>-1</sup>                                                          | 1        |
| Co <sub>4</sub> N@CNFs                               | Hydrothermal+Nitridation<br>Process                                                                                | ~11000 mAh g <sup>-1</sup> /00 mA g <sup>-1</sup>                                                       | 1.23 V/700 mA g <sup>-1</sup>                                   | 177/200 mA g <sup>-1</sup> -500 mAh g <sup>-1</sup>                                                          | 2        |
| CuGeO <sub>3</sub> @Graphene                         | Hydrothermal+Thermal<br>Treatment                                                                                  | 10030 mAh g <sup>-1</sup> /200 mA g <sup>-1</sup>                                                       | 1.50 V/200 mA g <sup>-1</sup>                                   | 50/1000 mA g <sup>-1</sup> -2000 mAh g <sup>-1</sup>                                                         | 3        |
| Co <sub>9</sub> S <sub>8</sub> @CFs                  | Hydrothermal+Thermal<br>Treatment                                                                                  | 6875 mAh g <sup>-1</sup> /50 mA g <sup>-1</sup>                                                         | 0.57 V/50 mA g <sup>-1</sup>                                    | 105/100 mA g <sup>-1</sup> -500 mAh g <sup>-1</sup>                                                          | 4        |
| (Mn <sub>1/3</sub> Co <sub>2/3</sub> )O@CNTs         | One-pot Spray Pyrolysis<br>Infiltrated+Thermal<br>Treatment                                                        | 20588 mAh g <sup>-1</sup> /500 mA g <sup>-1</sup> -<br>7646 mAh g <sup>-1</sup> /200 mA g <sup>-1</sup> | 0.64 V/200 mA g <sup>-1</sup><br>~1.25 V/200 mA g <sup>-1</sup> | 245/200 mA g <sup>-1</sup> -500 mAh g <sup>-1</sup><br>700h/500 mA g <sup>-1</sup> -500 mAh g <sup>-1</sup>  | 5<br>6   |
| N-Co@Graphene                                        | Reaction+Thermal<br>Treatment                                                                                      | -                                                                                                       | ~0.9 V/0.1 mA cm <sup>-2</sup>                                  | 30/0.1 mA cm <sup>-2</sup> -1 mAh cm <sup>-2</sup>                                                           | 7        |
| Pd-C@CP                                              | Electrophoretic+In-Situ<br>Modification                                                                            | 5900 mAh g <sup>-1</sup> /1500 mA g <sup>-1</sup>                                                       | ~1 V/300 mA g <sup>-1</sup>                                     | 213/300 mA g <sup>-1</sup> -1000 mAh g <sup>-1</sup>                                                         | 8        |
| Ag/La <sub>0.9</sub> FeO <sub>3-δ</sub>              | Electrospinning+Thermal<br>Treatment                                                                               | 8476 mAh g <sup>-1</sup> /100 mA g <sup>-1</sup>                                                        | 0.66 V/100 mA g <sup>-1</sup>                                   | 174/100 mA g <sup>-1</sup> -1000 mAh g <sup>-1</sup>                                                         | 9        |
| Co <sub>3</sub> O <sub>4</sub> /Ag                   | Solution<br>Reaction+Hydrothermal<br>Thermal Treatment+In-<br>Situ Modification+Atom<br>Interdiffusion<br>Solution | 12000 mAh g <sup>-1</sup> /200 mA g <sup>-1</sup><br>22551 mAh g <sup>-1</sup> /1000 mA g <sup>-1</sup> | ~1.2 V/200 mA g <sup>-1</sup><br>0.68 V/1000 mA g <sup>-1</sup> | 80/200 mA g <sup>-1</sup> -1000 mAh g <sup>-1</sup><br>268/1000 mA g <sup>-1</sup> -3000 mAh g <sup>-1</sup> | 10<br>11 |
| Au/Cu@FCu                                            | Immersion+Redox<br>Replacement                                                                                     | 27270 mAh g <sup>-1</sup> /100 mA g <sup>-1</sup>                                                       | 0.64 V/100 mA g <sup>-1</sup>                                   | 220/100 mA g <sup>-1</sup> -500 mAh g <sup>-1</sup>                                                          | 12       |
| Pd/NiCo <sub>2</sub> O <sub>4</sub>                  | Hydrothermal+Solution<br>Immersion                                                                                 | 4000 mAh g <sup>-1</sup> /200 mA g <sup>-1</sup>                                                        | ~1.3 V/100 mA g <sup>-1</sup>                                   | 100/200 mA g <sup>-1</sup> -1000 mAh g <sup>-1</sup>                                                         | 13       |
| Ru/ZnIn <sub>2</sub> S <sub>4-x</sub>                | Hydrothermal+Solution<br>Immersion                                                                                 | 3532mAh g <sup>-1</sup> /500 mA g <sup>-1</sup>                                                         | 0.77 V/500 mA g <sup>-1</sup>                                   | 1254h/500 mA g <sup>-1</sup> -1000 mAh g <sup>-1</sup>                                                       | 14       |
| Pd/Pd <sub>4</sub> S                                 | Solution Reaction                                                                                                  | 8777 mAh g <sup>-1</sup> /100 mA g <sup>-1</sup>                                                        | 1.55 V/100 mA g <sup>-1</sup>                                   | 160/500 mA g <sup>-1</sup> -500 mAh g <sup>-1</sup>                                                          | 15       |
| MnO <sub>2</sub> /Co <sub>3</sub> O <sub>4</sub> @CP | Hydrothermal+Thermal<br>Treatment                                                                                  | 4850 mAh g <sup>-1</sup> /103 mA g <sup>-1</sup>                                                        | 0.95 V/103 mA g <sup>-1</sup>                                   | 53/103 mA g <sup>-1</sup> -1030 mAh g <sup>-1</sup>                                                          | 16       |
| NiCo <sub>2</sub> S <sub>4</sub> /NiO                | Hydrothermal+Solution                                                                                              | 10050 mAh g <sup>-1</sup> /200 mA g <sup>-1</sup>                                                       | 0.88 V/200 mA g <sup>-1</sup>                                   | 300/200 mA g <sup>-1</sup> -1000 mAh g <sup>-1</sup>                                                         | 17       |

|                                                        |                                   |                                                   |                               |                                                      |    |
|--------------------------------------------------------|-----------------------------------|---------------------------------------------------|-------------------------------|------------------------------------------------------|----|
|                                                        | Immersion+Thermal Treatment       |                                                   |                               |                                                      |    |
| PdO/Co <sub>3</sub> O <sub>4</sub>                     | Solution                          | -                                                 | 0.22 V/200 mA g <sup>-1</sup> | 90/200 mA g <sup>-1</sup> -500 mAh g <sup>-1</sup>   | 18 |
|                                                        | Immersion+Pyrolysis               |                                                   |                               |                                                      |    |
| Co <sub>3</sub> O <sub>4</sub> /MnO <sub>2</sub>       | Hydrothermal+Thermal Treatment    | 5738 mAh g <sup>-1</sup> /100 mA g <sup>-1</sup>  | 0.82 V/100 mA g <sup>-1</sup> | 60/200 mA g <sup>-1</sup> -1000 mAh g <sup>-1</sup>  | 19 |
| NiCo <sub>2</sub> O <sub>4</sub> /NiO                  | Hydrothermal                      | 17463 mAh g <sup>-1</sup> /500 mA g <sup>-1</sup> | 0.98 V/500 mA g <sup>-1</sup> | 500/100 mA g <sup>-1</sup> -1000 mAh g <sup>-1</sup> | 20 |
| Mo <sub>2</sub> C/MoO <sub>2</sub>                     | Hydrothermal+Thermal Treatment    | ~2000 mAh g <sup>-1</sup> /800 mA g <sup>-1</sup> | 0.56 V/200 mA g <sup>-1</sup> | 100/200 mA g <sup>-1</sup> -1000 mAh g <sup>-1</sup> | 21 |
|                                                        | Solution                          |                                                   |                               |                                                      |    |
| RuO <sub>2</sub> /Mn <sub>2</sub> O <sub>3</sub>       | Reaction+Electrospinning          | -                                                 | 0.96 V/100 mA g <sup>-1</sup> | 121/400 mA g <sup>-1</sup> -1000 mAh g <sup>-1</sup> | 22 |
|                                                        | Hydrothermal+Thermal Treatment    |                                                   |                               |                                                      |    |
| Urchin-NiO/NiCo <sub>2</sub> O <sub>4</sub>            | Hydrothermal                      | 9231 mAh g <sup>-1</sup> /100 mA g <sup>-1</sup>  | 1.48 V/100 mA g <sup>-1</sup> | 80/100 mA g <sup>-1</sup> -600 mAh g <sup>-1</sup>   | 23 |
| NiS <sub>2</sub> /ZnIn <sub>2</sub> S <sub>4</sub>     | Hydrothermal                      | 3682 mAh g <sup>-1</sup> /500 mA g <sup>-1</sup>  | ~1.2 V/500 mA g <sup>-1</sup> | 490/500 mA g <sup>-1</sup> -500 mAh g <sup>-1</sup>  | 24 |
| CoSe <sub>2</sub> /NiSe <sub>2</sub>                   | Hydrothermal+Thermal Treatment    | 3530 mAh g <sup>-1</sup> /600 mA g <sup>-1</sup>  | 0.95 V/100 mA g <sup>-1</sup> | 250/200 mA g <sup>-1</sup> -1000 mAh g <sup>-1</sup> | 25 |
| Ni <sub>3</sub> Se <sub>2</sub> /NiSe <sub>2</sub> @NF | Hydrothermal                      | 23092 mAh g <sup>-1</sup> /500 mA g <sup>-1</sup> | 0.38 V/100 mA g <sup>-1</sup> | 500/100 mA g <sup>-1</sup> -1000 mAh g <sup>-1</sup> | 26 |
|                                                        | Hydrothermal+Solution Reaction    |                                                   |                               |                                                      |    |
| CdSe/ZnS QD@CNT                                        | Reaction                          | -                                                 | ~1.3 V/100 mA g <sup>-1</sup> | 100/100 mA g <sup>-1</sup> -1000 mAh g <sup>-1</sup> | 27 |
|                                                        | Co-precipitation +Self-assembling |                                                   |                               |                                                      |    |
| Co-Fe-(LDH) /RuO <sub>2</sub>                          | Co-precipitation +Self-assembling | ~4300 mAh g <sup>-1</sup> /10 mA cm <sup>-2</sup> | 0.64 V/100 mA g <sup>-1</sup> | 100/10 mA cm <sup>-2</sup> -800 mAh g <sup>-1</sup>  | 28 |

<sup>a</sup>The specific discharge capacities were calculated based on the amount of catalysts in the cathodes.

1. W. J. Kwak, K. C. Lau, C. D. Shin, K. Amine, L. A. Curtiss and Y. K. Sun, *ACS Nano*, 2015, **9**, 4129-4173.
2. K. R. Yoon, K. Shin, J. Park, S. H. Cho, C. Kim, J. W. Jung, J. Y. Cheong, H. R. Byon, H. M. Lee and I. D. Kim, *ACS Nano*, 2018, **12**, 128-139.
3. G. H. Lee, M. C. Sung, J. C. Kim, H. J. Song and D. W. Kim, *Adv. Energy Mater.*, 2018, **8**, 1801930.
4. X. D. Lin, R. M. Yuan, S. R. Cai, Y. H. Jiang, J. Lei, S. G. Liu, Q. H. Wu, H. G. Liao, M. S. Zheng and Q. F. Dong, *Adv. Energy Mater.*, 2018, **8**, 1800089.
5. J. H. Kim, Y. J. Oh and Y. C. Kang, *Carbon*, 2018, **128**, 125-133.
6. Y. Luo, C. Jin, Z. Wang, M. Wei, C. Yang, R. Yang, Y. Chen and M. Liu, *Journal of Materials Chemistry A*, 2017, **5**, 5690-5695.
7. G. Tan, L. Chong, R. Amine, J. Lu, C. Liu, Y. Yuan, J. Wen, K. He, X. Bi, Y. Guo, H. H. Wang, R. Shahbazian-Yassar, S. Al Hallaj, D. J. Miller, D. Liu and K. Amine, *Nano Lett.*, 2017, **17**, 2959-2966.
8. J. J. Xu, Z. L. Wang, D. Xu, L. L. Zhang and X. B. Zhang, *Nat. Commun.*, 2013, **4**, 2438.
9. Y. Cong, Q. Tang, X. Wang, M. Liu, J. Liu, Z. Geng, R. Cao, X. Zhang, W. Zhang, K. Huang and S. Feng, *ACS Catal.*, 2019, **9**, 11743-11752.
10. R. Gao, Z. Yang, L. Zheng, L. Gu, L. Liu, Y. Lee, Z. Hu and X. Liu, *ACS Catal.*, 2018, **8**, 1955-

1963.

11. J. J. Xu, Z. W. Chang, Y. B. Yin and X. B. Zhang, *ACS Cent. Sci.*, 2017, **3**, 598-604.
12. N. Luo, G. J. Ji, H. F. Wang, F. Li, Q. C. Liu and J. J. Xu, *ACS Nano*, 2020, **14**, 3281-3289.
13. D. A. Agyeman, M. Park and Y. M. Kang, *J. Mater. Chem. A*, 2017, **5**, 22234-22241.
14. R. X. Liang, C. Z. Shu, A. J. Hu, C. X. Xu, R. X. Zheng, M. L. Li, Y. W. Guo, M. He, Y. Yan and J. P. Long, *J. Mater. Chem. A*, 2020, **8**, 11337-11345.
15. Q. S. Huang, F. Dang, H. T. Zhu, L. L. Zhao, B. He, Y. Wang, J. Wang and X. M. Mai, *J. Power Sources*, 2020, **451**, 227738.
16. P. Zhang, S. Zhang, M. He, J. Lang, A. Ren, S. Xu and X. Yan, *Adv. Sci.*, 2017, **4**, 1700172.
17. P. Wang, C. Li, S. Dong, X. Ge, P. Zhang, X. F. Miao, R. Wang, Z. Zhang and L. Yin, *Adv. Energy Mater.*, 2019, **9**, 1900788.
18. Y. Zhang, J. Ma, M. W. Yuan, Y. Li, R. A. Shen, W. C. Cheong, T. Han, G. B. Sun, C. Chen and C. Y. Nan, *Chem. Commun.*, 2019, **55**, 12683-12686.
19. Y. J. Lee, D. H. Kim, T.-G. Kang, Y. Ko, K. Kang and Y. J. Lee, *Chemistry of Materials*, 2017, **29**, 10542-10550.
20. R. X. Liang, A. J. Hu, M. L. Li, Z. Q. Ran, C. Z. Shu and J. Long, *Electrochim Acta*, 2019, **321**, 134716.
21. C. Wu, Y. Y. Hou, J. C. Jiang, H. P. Guo, H. K. Liu, J. Chen and J. Z. Wang, *J. Power Sources*, 2020, **470**, 228317.
22. K. R. Yoon, G. Y. Lee, J. W. Jung, N. H. Kim, S. O. Kim and I. D. Kim, *Nano Lett.*, 2016, **16**, 2076-2083.
23. W. Zhao, X. Li, R. Yin, L. Qian, X. Huang, H. Liu, J. Zhang, J. Wang, T. Ding and Z. Guo, *Nanoscale*, 2018, **11**, 50-59.
24. A. Hu, W. Lv, T. Lei, W. Chen, Y. Hu, C. Shu, X. Wang, L. Xue, J. Huang, X. Du, H. Wang, K. Tang, C. Gong, J. Zhu, W. He, J. Long and J. Xiong, *ACS Nano*, 2020, **14**, 3490-3499.
25. R. X. Liang, C. Z. Shu, A. J. Hu, M. L. Li, Z. Q. Ran, R. X. Zheng and J. P. Long, *Chem. Eng. J.*, 2020, **393**, 124592.
26. Z. Q. Ran, C. Z. Shu, Z. Q. Hou, L. J. Cao, R. X. Liang, J. B. Li, P. Hei, T. S. Yang and J. P. Long, *J. Power Sources*, 2020, **468**, 228308.
27. V. Veeramani, Y. H. Chen, H. C. Wang, T. F. Hung, W. S. Chang, D. H. Wei, S. F. Hu and R. S. Liu, *Chem. Eng. J.*, 2018, **349**, 235-240.
28. X. Y. Jin, D. A. Agyeman, S. Kim, Y. H. Kim, M. G. Kim, Y. M. Kang and S. J. Hwang, *Nano Energy*, 2020, **67**, 104192.
